# Supplementary material
Source: PubMed Central journal article supplement (PMC524341)
Supplement: 7600405s1.pdf [file 7600405s1.pdf]

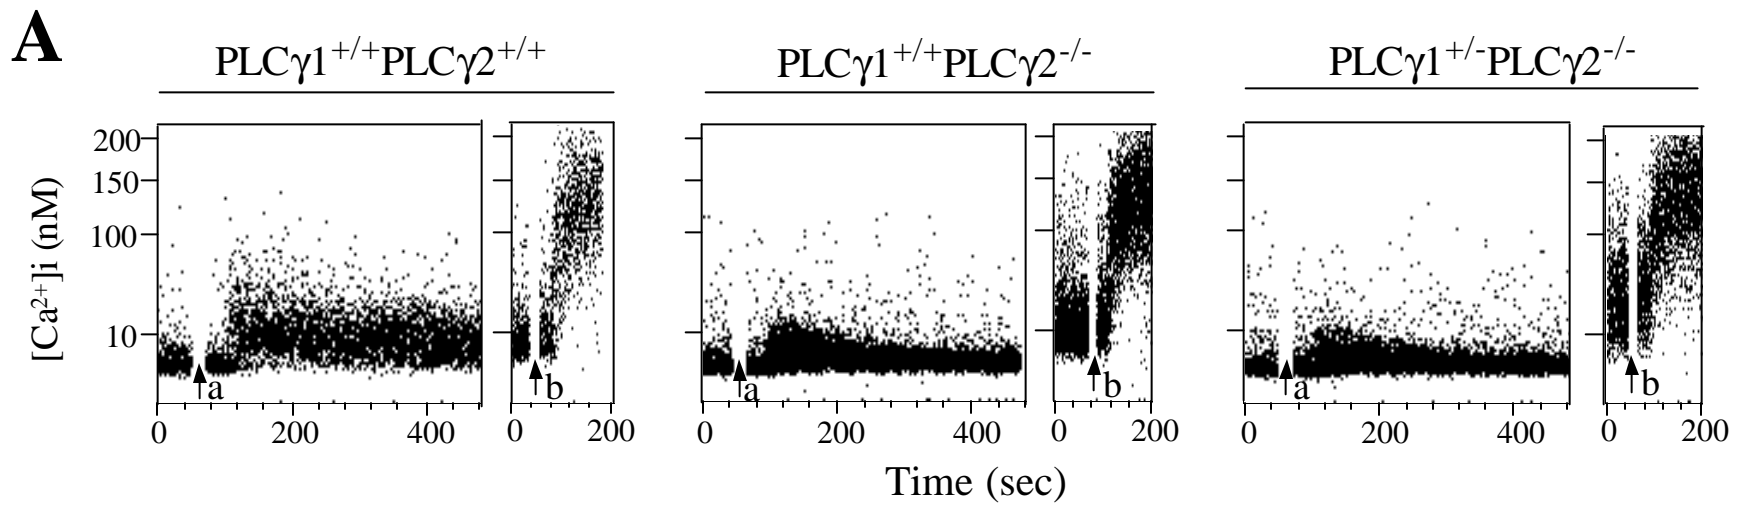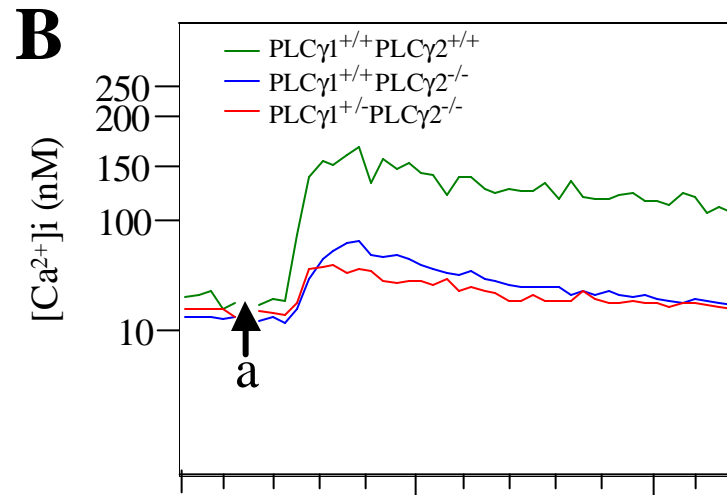

**Supplementary Figure 1.** Further reduction of Ca<sup>2+</sup> flux in PLC $\gamma$ 1<sup>+/-</sup>PLC $\gamma$ 2<sup>-/-</sup>, relative to wild-type or PLC $\gamma$ 2<sup>-/-</sup>, T1 B cells in response to anti- $\mu$  antibodies. **(A)** Splenocytes from mice of the indicated genotypes were incubated with indo-1<sup>AM</sup>, PE-conjugated anti-IgM and FITC-conjugated anti-IgD antibodies. The cells were then washed and stimulated with anti- $\mu$  antibodies. Induction of Ca<sup>2+</sup> mobilization was determined in T1 B cells (IgD-IgM<sup>+</sup>) by flow cytometry. Anti- $\mu$  antibodies were added at the time indicated by arrow a. Ionomycin was added at the time indicated by arrow b. **(B)** BCR-mediated Ca<sup>2+</sup> flux curves of wild-type, PLC $\gamma$ 2<sup>-/-</sup>, and PLC $\gamma$ 1<sup>+/-</sup>PLC $\gamma$ 2<sup>-/-</sup> B cells were overlaid. The figure shown is representative of three independent experiments.
