# Supplementary material
Source: PubMed Central journal article supplement (PMC524341)
Supplement: 7600405s5.pdf [file 7600405s5.pdf]

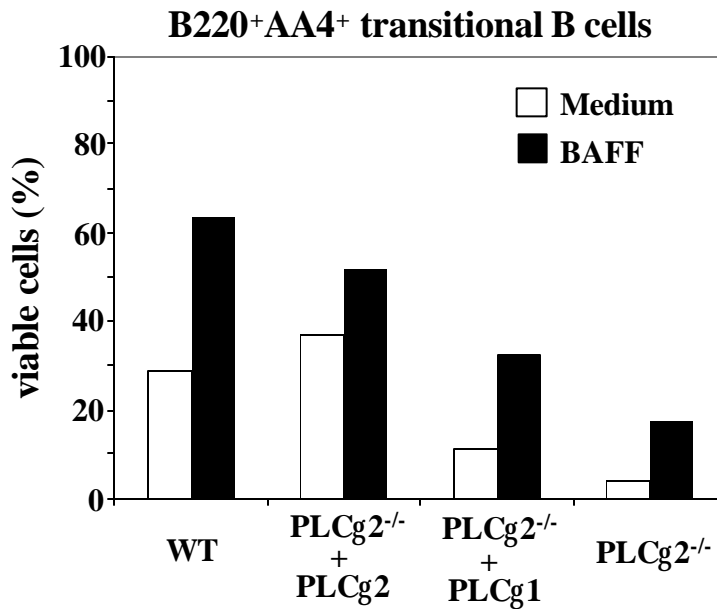

**Supplementary Figure 5.** Slight restoration of basal and BAFF-mediated survival of PLC $\gamma$ 2-deficient transitional B cells by enforced-expression of PLC $\gamma$ 1. Transitional B cells (GFP<sup>+</sup>B220<sup>+</sup>AA4<sup>+</sup>) were sorted from the splenocytes of wild-type (WT), PLC $\gamma$ 2-deficient (PLC $\gamma$ 2<sup>-/-</sup>) mice, or JAK3-deficient recipient mice that were reconstituted with PLC $\gamma$ 2-deficient bone marrow transduced with PLC $\gamma$ 2-IRES-GFP retroviruses (PLC $\gamma$ 2<sup>-/-</sup> + PLC $\gamma$ 2) or with PLC $\gamma$ 1-IRES-GFP retroviruses (PLC $\gamma$ 2<sup>-/-</sup> + PLC $\gamma$ 1) and cultured in the absence or presence of BAFF for 48 h. Cell death was measured by staining with propidium iodide. The figure shown is representative of three independent analyses.
